1 **Multiscale cardiac imaging to capture the whole heart and its internal cellular**  
2 **architecture, with applications to congenital heart disease**

3 Graham Rykiel<sup>1</sup>, Claudia S. López<sup>1,3</sup>, Jessica L. Riesterer<sup>1,3</sup>, Ian Fries<sup>1</sup>, Sanika Deosthali<sup>1</sup>, Katherine  
4 Courchaine<sup>1</sup>, Alina Maloyan<sup>2</sup>, Kent Thornburg<sup>2</sup>, Sandra Rugonyi<sup>1,2</sup> \*

5 <sup>1</sup>. Biomedical Engineering, <sup>2</sup>. Center for Developmental Health, Knight Cardiovascular Institute, <sup>3</sup>. Multiscale  
6 Microscopy Core, Oregon Health & Science University, Portland Oregon, USA

7

8 \* Corresponding author: Sandra Rugonyi, rugonyis@ohsu.edu

9 **Abstract**

10 Efficient cardiac pumping depends on the morphological structure of the heart, but also on its  
11 sub-cellular (ultrastructural) architecture, which enables cardiac contraction. In cases of  
12 congenital heart defects, localized sub-cellular disruptions in architecture that increase the risk  
13 of heart failure are only starting to be discovered. This is in part due to a lack of technologies  
14 that can image the three dimensional (3D) heart structure, assessing malformations; and its  
15 ultrastructure, assessing disruptions. We present here a multiscale, correlative imaging  
16 procedure that achieves high-resolution images of the whole heart, using 3D micro-computed  
17 tomography (micro-CT); and its ultrastructure, using 3D scanning electron microscopy (SEM).  
18 This combination of technologies has not been possible before in imaging the same cardiac  
19 sample due to the heart large size, even when studying small fetal and neonatal animal models  
20 (~5x5x5mm<sup>3</sup>). Here, we achieved uniform fixation and staining of the whole heart, without losing  
21 ultrastructural preservation (at the nm resolution range). Our approach enables multiscale  
22 studies of cardiac architecture in models of congenital heart disease and beyond.

23

## 24 Introduction

25 Congenital heart disease (CHD), which manifests as a morphologically defective heart, affects  
26 about 1% of newborn babies, and remains the primary cause of non-infectious children mortality  
27 in the developed world<sup>1,2</sup>. While CHD mortality rates have been dramatically reduced in recent  
28 years thanks to advances in surgical practice and interventional technologies<sup>1,3</sup>, CHD patients  
29 continue to be at an increased risk of developing heart failure at a much younger age than the  
30 general population<sup>4</sup>. Despite early indicators of success, heart failure continues to take the lives  
31 of young children with CHD: 10 to 25% of newborns with a critical heart defect do not survive  
32 the first year, and 44% do not survive to 18 years of age<sup>5,6</sup>. This unfortunate trend points to  
33 cardiac deficiencies in CHD that are not yet understood<sup>7</sup>.

34 While the structural (morphological or “geometrical”) characteristics of heart malformations have  
35 been extensively studied, it is largely unknown whether cardiac cells from malformed hearts are  
36 normal or to what extent they are compromised. Recent studies reveal an abnormal orientation  
37 of myocardial cells (the heart muscle cells) within CHD hearts<sup>8-10</sup>. Myocardial cells are  
38 elongated, cylindrical-like cells, that contract along their long axis. In a normal heart, myocardial  
39 cells arrange in sheet-like layers with their long axes in parallel to each other forming an  
40 elliptical pattern<sup>11,12</sup>. Newly developed contrast episcopic microscopy and synchro micro-CT  
41 imaging techniques, enable non-destructive analyses of banked human fetal and neonatal  
42 hearts with CHD.<sup>9,10</sup> These studies are revealing myocardial disarray in CHD (with respect to  
43 their normal counterparts) that very likely affect cardiac function after surgical repair, and that  
44 have been ignored when planning treatment strategies for CHD patients. In addition to changes  
45 in the myocardial organization, the sub-cellular contraction machinery of myocardial cells (e.g  
46 the myofibrils that contract the cell; and the mitochondria that provide energy for contraction)  
47 may also be compromised in CHD, affecting heart function. The extent to which the cells of  
48 malformed hearts exhibit deficiencies is unknown<sup>8,10,13</sup>. This is in part due to limitations of  
49 existing technologies that have not achieved precise multiscale mapping to decipher the  
50 association between structural and cellular deficiencies in the heart and beyond.

51 We describe here a novel, correlative multiscale imaging procedure that combines imaging of  
52 whole heart morphology and its sub-cellular organization (ultrastructural architecture). Our  
53 multiscale procedure uses micro computed tomography (micro-CT) imaging to capture heart  
54 morphology at micrometer resolution, and scanning electron microscopy (SEM) to capture  
55 cardiac tissue ultrastructure at nanometer resolution. Current SEM technologies allow for three-  
56 dimensional (3D) imaging of sub-cellular architecture, enabling reconstruction and quantification  
57 of ultrastructural features within a tissue volume<sup>14-16</sup>. Among 3D SEM methods, we have  
58 selected serial block-face SEM (SBF-SEM) for ultrastructural imaging, as it allows 3D imaging of  
59 relatively large volumes (sample size 40x60x40  $\mu\text{m}^3$ ). The methodology we present herein  
60 improves upon previous protocols by achieving uniform staining of a relatively large heart  
61 sample (3-4 mm wide, 5-6 mm long), circumventing micro-CT x-ray penetration issues, and  
62 allowing sample screening and selection prior to full sample preparation. Our multiscale imaging,  
63 further, enables mapping of structural and ultrastructural heart features.

64 As proof of concept, we applied our developed multiscale imaging procedure to two embryonic  
65 chick hearts. These hearts were collected at stages corresponding to about 5-6 months of  
66 human fetal development, when the heart is already formed but maturing in preparation for  
67 birth/hatching. We imaged: 1) a control heart with no structural defects; and 2) a heart with  
68 tetralogy of Fallot (TOF), a combination of structural heart malformations found in humans<sup>17,18</sup>.  
69 Our results suggest differences in the ultrastructure of these two hearts, emphasizing the need  
70 for a multiscale approach to deepen our understanding of CHD and enable the development of  
71 effective strategies to combat heart failure in CHD.

## 72 **Results**

### 73 Overview of multiscale imaging procedure:

74 To achieve multiscale imaging we followed a four-step protocol (see **Figure 1**; details in  
75 Methods). Briefly, in **Step 1** the heart was excised, homogeneously fixed and stained for micro-  
76 CT. Initial staining followed a modified ferrocyanide-reduced osmium–thiocarbohydrazide–  
77 osmium (ROTO) protocol<sup>19-21</sup> typically used for electron microscopy (EM) sample preparation.  
78 Three-dimensional micro-CT images (10  $\mu\text{m}$  resolution) confirmed uniform ROTO staining of the  
79 whole heart and provided morphological cardiac details. At this time the heart samples were  
80 stored until further processing, enabling selection of specific samples for full processing based  
81 on micro-CT scans. **Step 2** finalized the preparation of the whole heart for SBF-SEM by post-  
82 staining the hearts with uranyl acetate and lead aspartate and then embedding them in a resin  
83 block. Uniform staining was confirmed on a semithin (250 nm) section of the block, which also  
84 determined ultrastructural quality and enabled registration to micro-CT images. In **Step 3**, a slab  
85 of the sample was cut and sectioned around a specific region of interest (ROI,  $\sim 500 \times 500 \mu\text{m}^2$ )  
86 from which sub-ROIs for 3D SBF-SEM imaging ( $\sim 40 \times 60 \mu\text{m}^2$ ) were selected. In **Step 4**, 3D  
87 SBF-SEM datasets were acquired (10 nm lateral resolution and 40 nm depth resolution).

88

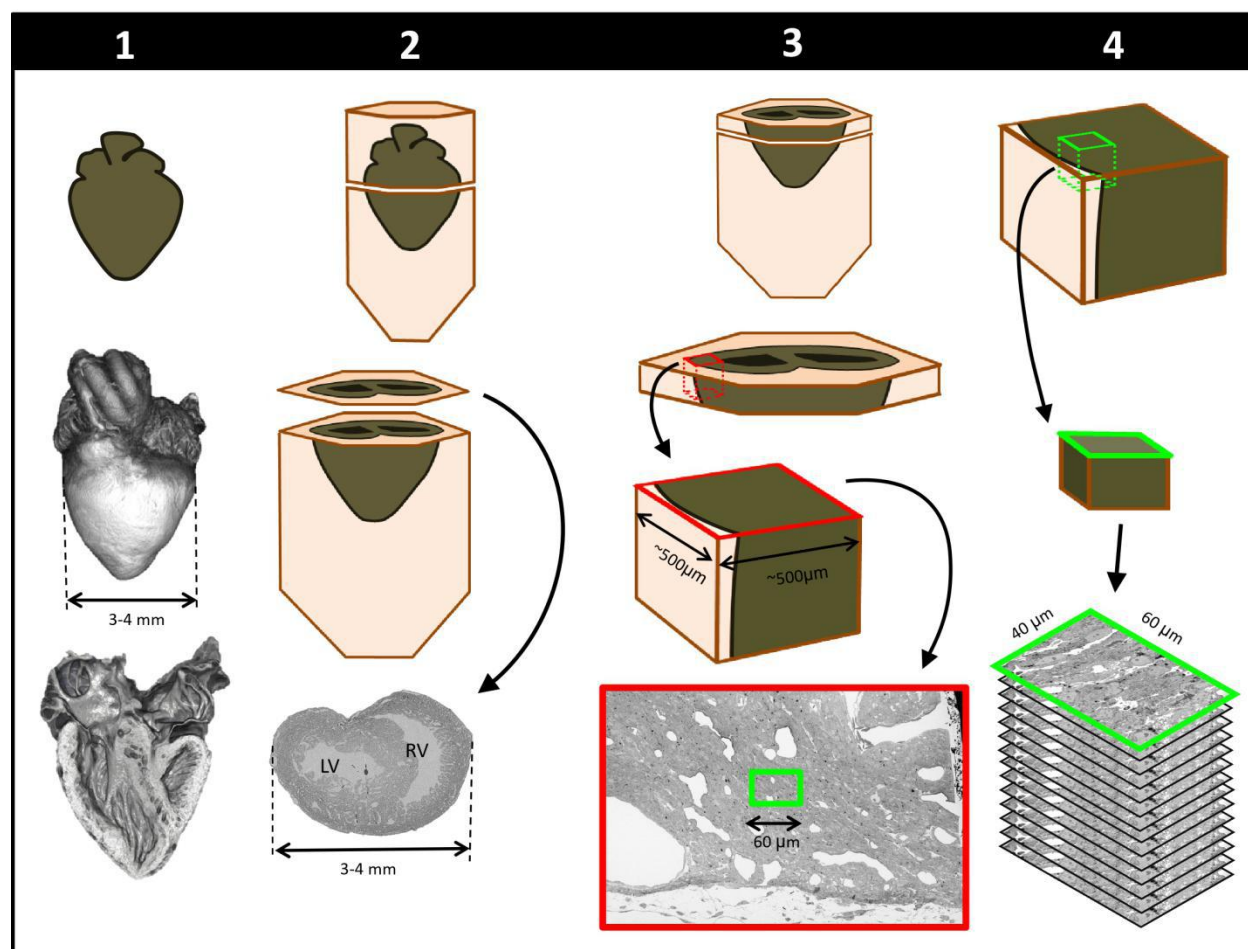

89

90 **Figure 1:** Schematics of steps performed to achieve cardiac multiscale imaging, which yields  
91 both 3D whole-heart images and 3D ultrastructural images from the same heart. Columns depict  
92 the four steps employed. In **Step 1**, the heart is post-fixed with osmium tetroxide to provide  
93 contrast for 3D micro-CT images of the whole heart (middle row). Digital sections of the micro-  
94 CT scans (bottom row) reveal the heart's interior and allow for cardiac phenotyping and  
95 assessment of stain penetration. In **Step 2**, contrast staining is finalized and the resin block in  
96 which the heart is embedded is sectioned to reach a plane of interest (bottom row). In **Step 3**,  
97 after cutting a slab of the sample, a region of interest (ROI) is sectioned from the slab, mounted,  
98 and then scanned by SEM backscattered imaging methods to aid in the selection of sub-ROIs  
99 (for example, the sub-ROI highlighted in green). In **Step 4**, the selected sub-ROI 3D SBF-SEM  
100 images are acquired by progressively sectioning and imaging 40nm thick layers.

101

#### 102 Whole heart imaging:

103 We obtained 3D micro-CT images of the whole heart, featuring both external and internal  
104 structures at 10 µm resolution (**Figure 2; Step 1 in Figure 1**). Despite the relatively large  
105 dimensions of the heart (5-6 mm long; 3-4 mm wide), tissue contrast was uniform across the  
106 heart walls and septae and allowed us to visualize the microstructural details of the heart  
107 chambers, valves, and great arteries.

108  
109

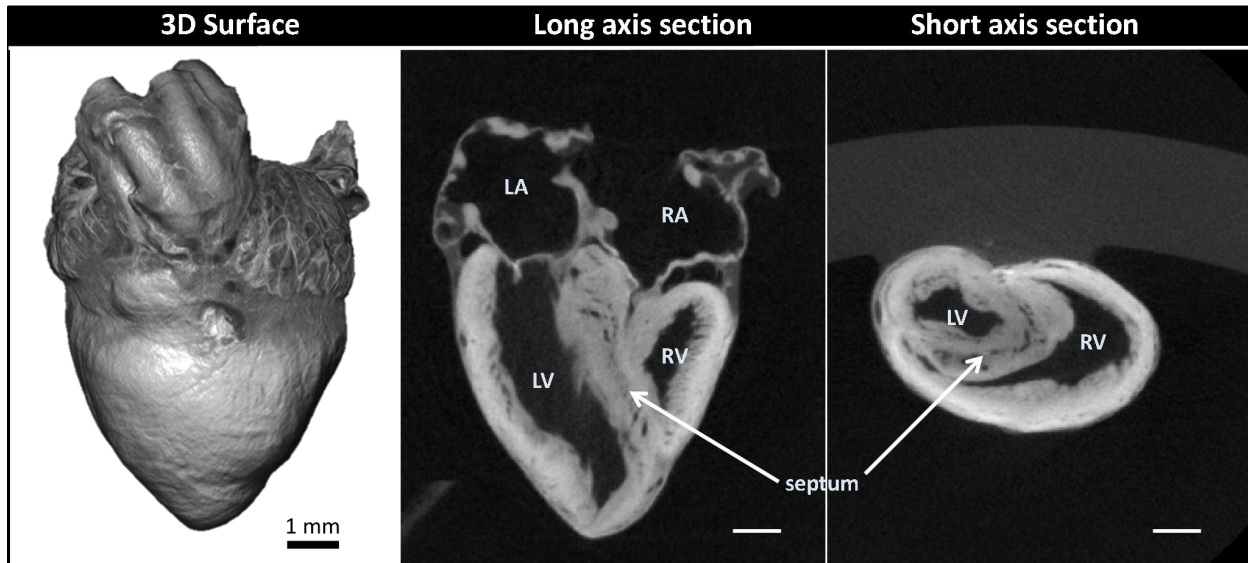

110

111 **Figure 2:** Micro-computed tomography (micro-CT) images of a chicken embryo normal heart.  
112 The contrast was achieved by following **Step 1** of our correlative multiscale imaging protocol  
113 (**Figure 1**). **From left to right:** External 3D surface of the heart; cardiac section along the  
114 heart's long axis (coronal section); cardiac section across the heart's short axis (transverse  
115 section). Cardiac sections show uniform staining across cardiac walls, and reveal the heart  
116 internal and external microstructure. LA: left atrium; LV: left ventricle; RA: right atrium; RV: right  
117 ventricle. Scale bars 1mm.

118

#### 119 Cardiac structure analysis from 3D micro-CT images:

120 Micro-CT images were used to explore the structural characteristics of several chick hearts, to  
121 select two hearts for subsequent SBF-SEM imaging and analysis. We selected: 1) a normal  
122 heart; and 2) a heart exhibiting TOF malformation. In a normal heart, blood in the left ventricle  
123 (LV) and right ventricle (RV) is separated by an interventricular septum; the pulmonary valve  
124 and pulmonary artery connect to the RV, which pumps blood to the lungs; and the aortic valve  
125 and aorta connect to the LV, which pumps blood to the body. TOF is characterized by a  
126 combination of 4 defects: i) ventricular septal defect, which is a hole in the interventricular  
127 septum; ii) overriding aorta, a change in the position of the aorta such that it sits in the middle of  
128 the two ventricles, on top of the ventricular septal defect; iii) pulmonary stenosis or atresia, a  
129 narrowing or closure of the pulmonary artery or pulmonary valve; and iv) RV hypertrophy, a  
130 thickening and enlargement of the RV wall. RV hypertrophy in TOF, however, develops over  
131 time as the stenosis of the pulmonary artery increases pressure in the RV after birth<sup>17</sup> and was  
132 not present in the heart examined in this study (see **Figure 3** for a comparison of the selected  
133 normal and TOF hearts). The TOF heart analyzed here featured supravalvular pulmonary  
134 stenosis, a ventricular septal defect, and an overriding aorta. The right ventricle was enlarged  
135 and thin-walled compared to the control heart (**Figure 3**). Further, the TOF heart was missing  
136 the right branch of the pulmonary artery. In humans, this rare condition, called unilateral

137 absence of a pulmonary artery, is known to occur in conjunction with TOF or cardiac septal  
 138 defects<sup>22</sup>.

139

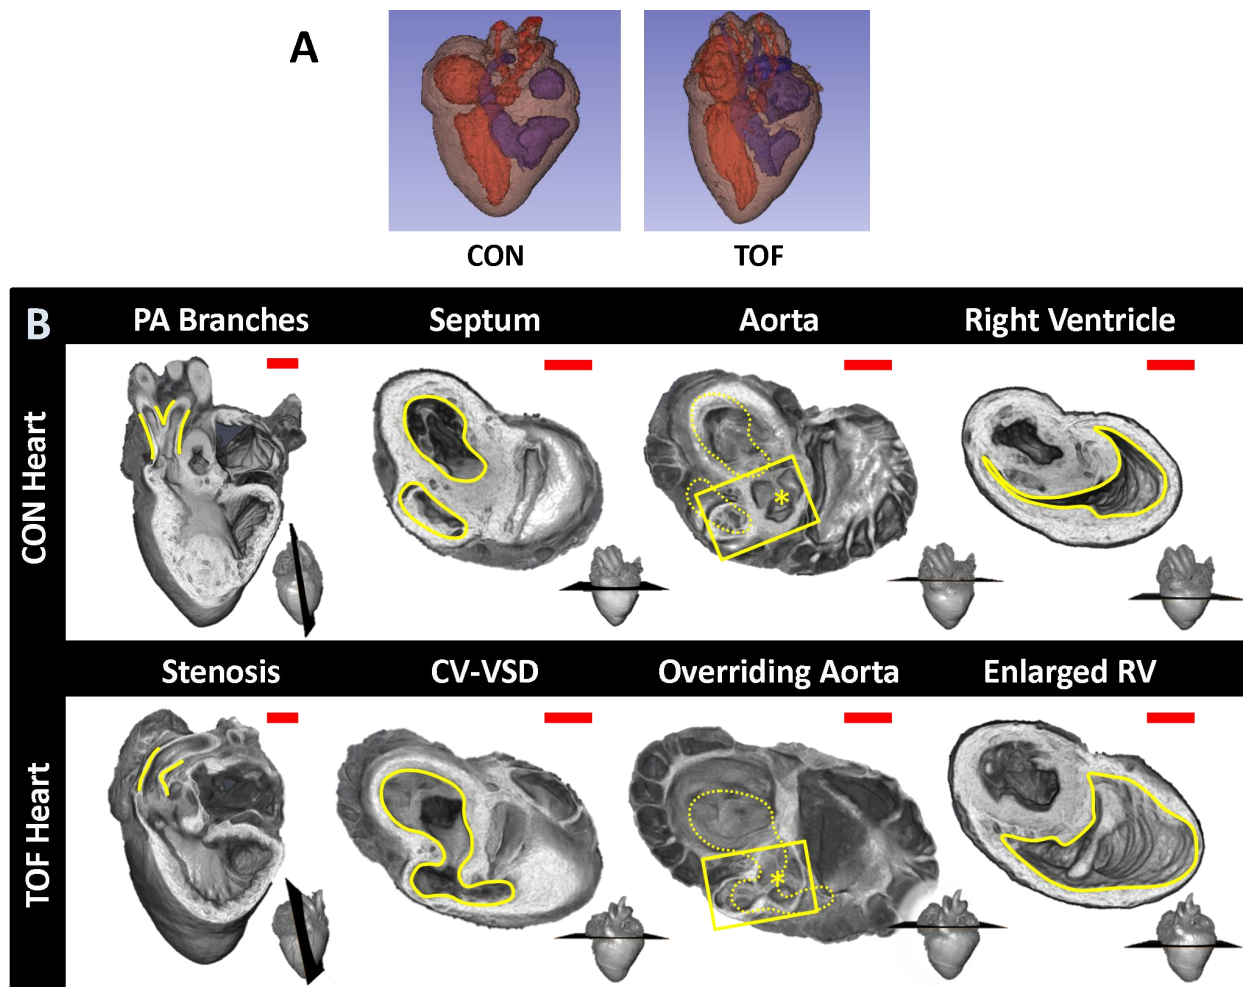

140

141 **Figure 3:** Comparison of micro-CT images of the two hearts selected for this study. **(A)**  
 142 Segmentations showing the heart morphology for the normal, control (CON) heart and the TOF  
 143 heart. Red: lumen of the left atrium and ventricle as well as aorta; Blue: lumen of the right atrium  
 144 and ventricle as well as pulmonary artery; Brown: heart tissue. **(B)** Detailed comparison of the  
 145 two hearts. Each column compares a cardiac feature (highlighted in yellow) between the hearts.  
 146 The position of the plane along which the tissue was cut for display is shown at the bottom right  
 147 of each image. From left to right: **Pulmonary artery (PA) branches:** On the control heart, the  
 148 PA is bifurcated (yellow lines) whereas the left branch of the PA is absent in the TOF heart. The  
 149 remaining PA of the TOF heart exhibits supravalvular stenosis (yellow lines). **Septum:** The  
 150 ventricles (yellow lines) in the control heart are discrete, separated by an intact interventricular  
 151 septum, whereas the TOF heart shows a conoventricular septal defect (CV-VSD). **Aorta:** In the  
 152 control heart the aortic valve (asterisk) is connected to the left ventricle, whereas in the TOF  
 153 heart the aortic valve is positioned directly over the VSD. Dotted yellow lines show the position  
 154 of yellow lines in the septum column. **Right Ventricle (RV):** The RV (yellow lines) is significantly  
 155 larger in the TOF heart than in the control heart, and features thinner walls. Scale bars = 1mm.

156

157 Cardiac ultrastructural imaging:

158 We chose to characterize the ultrastructure architecture of the selected hearts at approximately  
159 the transverse section at which the heart width (from LV to RV wall) is maximal, also referred to  
160 as the equatorial plane. Images of semithin cross-sections for each heart (**Figure 4**, top row;  
161 corresponding to **Step 2** in **Figure 1**) show that staining was uniform, indicating successful stain  
162 penetration through the heart tissues. Please note that the transverse section of the TOF heart  
163 was below the ventricular septal defect and thus exhibits a continuous septum.

164 Using the semithin section SEM images, ROIs from the hearts were selected. For this study, we  
165 selected two ROIs within the heart LV, denoted by ROI A and ROI B. After cutting the sample,  
166 the ROIs were first imaged with SBF-SEM at low resolution (65-80 nm lateral resolution; **Step 3**  
167 in **Figure 1**), from which sub-ROIs were further selected (see **Figure 4**). These sub-ROIs  
168 (~40x60  $\mu\text{m}^2$ ) were imaged at 10 nm lateral resolution, and we acquired 800-1000 images in  
169 depth (with ~40nm of depth distance, thus 32 to 40  $\mu\text{m}$  in depth). These high-resolution images  
170 showed the conservation of ultrastructural features (see **Figure 5**). Images exhibited continuous  
171 nuclear membranes, intact mitochondria, and defined myofibrils, indicating that we achieved  
172 both appropriate and uniform fixation and staining of the hearts with our protocol.

173

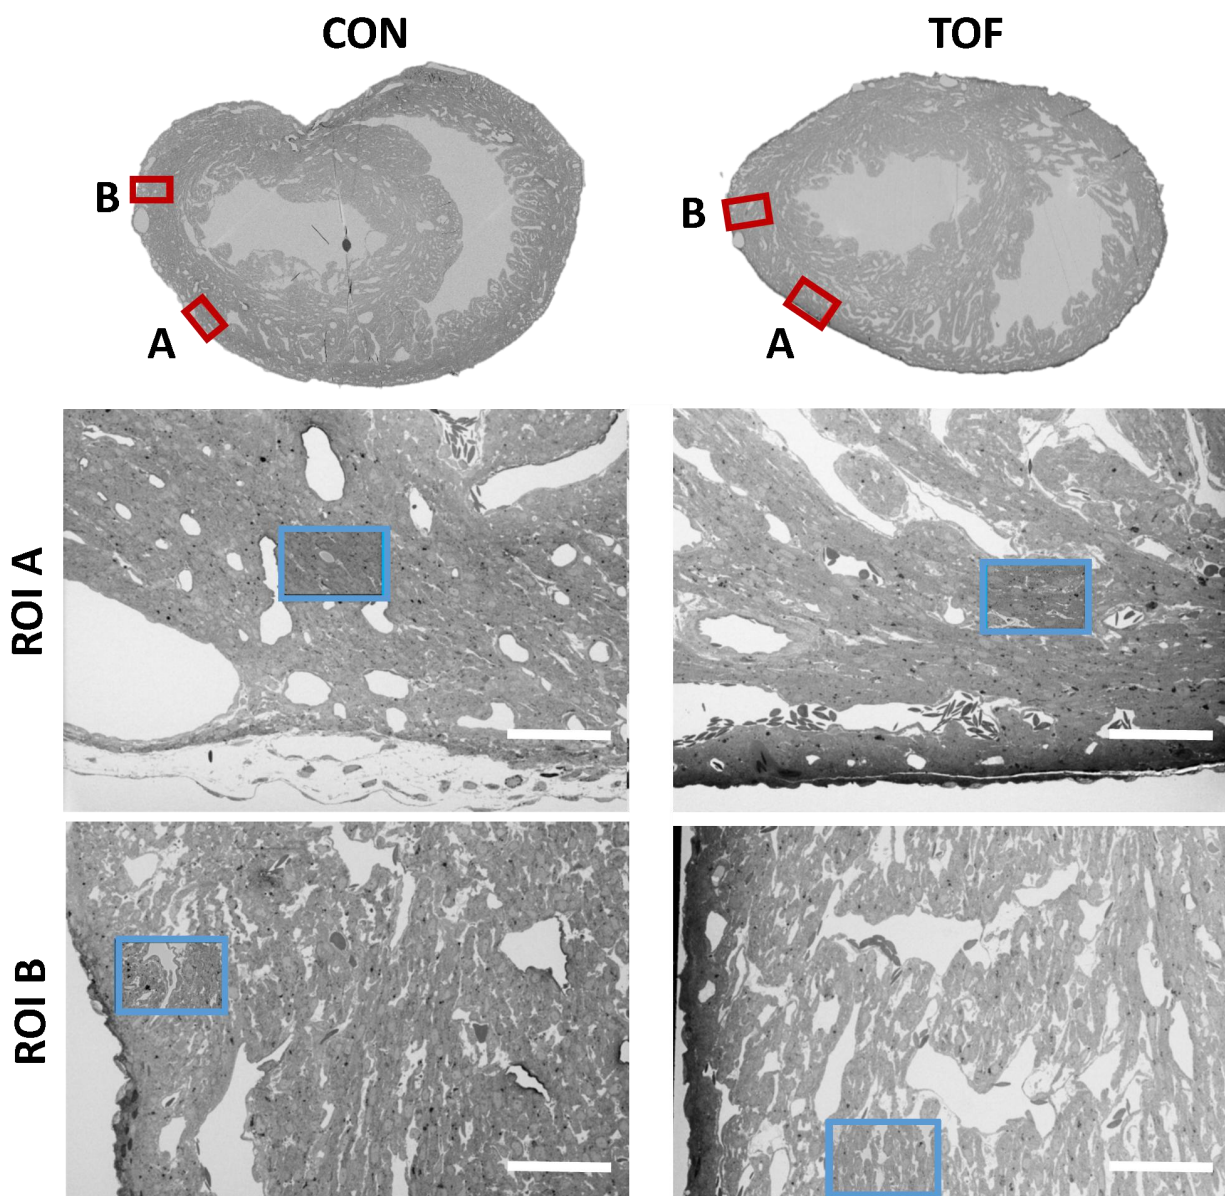

174

175 **Figure 4:** SBF-SEM images of the control (CON, left) and TOF (right) hearts, indicating the  
176 location of imaging. Overview scans from semithin transverse sections of each heart (**top row**)  
177 were used to confirm uniform stain penetration and the location of 2 ROIs per heart (ROI A and  
178 ROI B) further analyzed (red boxes). Semithin sections are not to scale. Blood vessels and  
179 trabeculae served as landmarks for accurate positioning of the ROIs and sub-ROIs. The sub-  
180 ROIs corresponding to ROI A (**second row**), were fully segmented (nuclei, extracellular space,  
181 myofibrils, and mitochondria). However, the sub-ROIs corresponding to ROI B (**third row**)  
182 were only partially segmented (only a fraction of the images in the stack were segmented) for  
183 quantification purposes. Scale bars 60 microns.

184

185



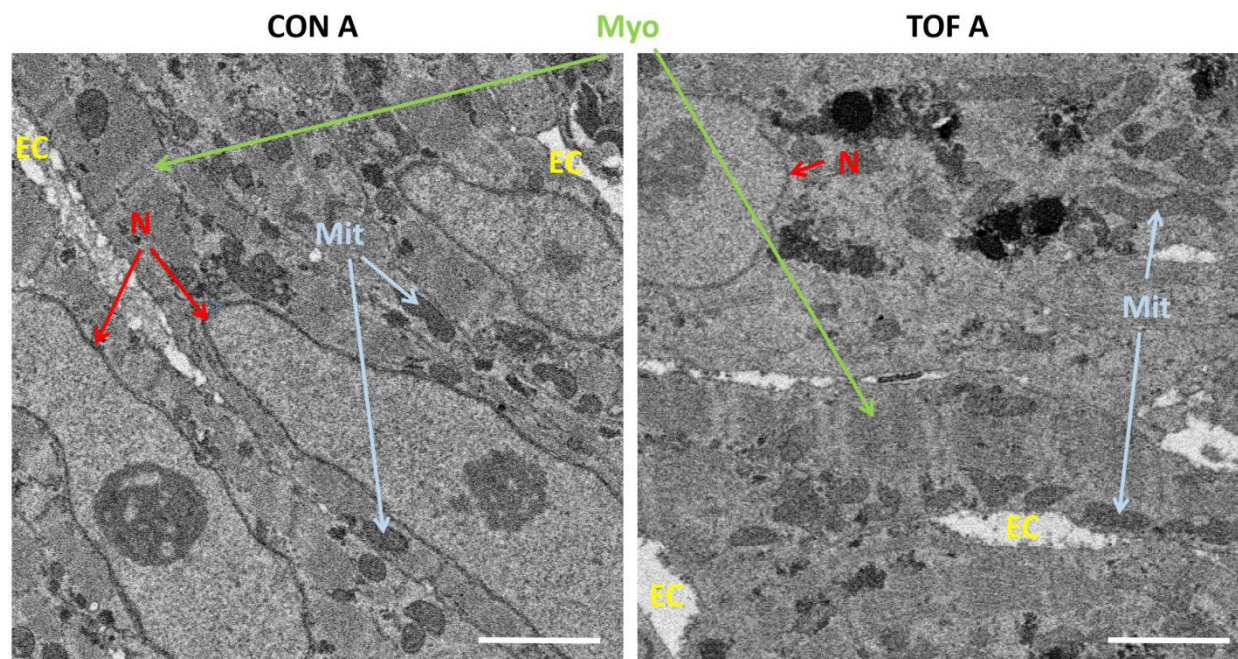

187  
188 **Figure 5:** Detail of high-resolution SBF-SEM images obtained. The pictures depict small regions  
189 within the selected sub-ROIs from region A of the control (CON) and TOF hearts. Nuclear  
190 membranes (N) are depicted, as well as myofibrils (Myo) and mitochondria (Mit). Finally, the  
191 extracellular space (EC) is also visible. Scale bars 2 microns.

192

### 193 3D SBF-SEM image reconstruction:

194 SBF-SEM image stacks provided 3D volumetric reconstructions of sub-ROIs. While volumetric  
195 image resolution was not isotropic (10 nm lateral resolution versus 40 nm depth resolution),  
196 ultrastructural features could be visualized from any angle of view within the reconstructed  
197 images (see **Figure 6**). Thus SBF-SEM images allowed us to visualize the orientation and  
198 organization of nuclei, myofibrils, and mitochondria (among other features) in heart tissue  
199 samples.

200

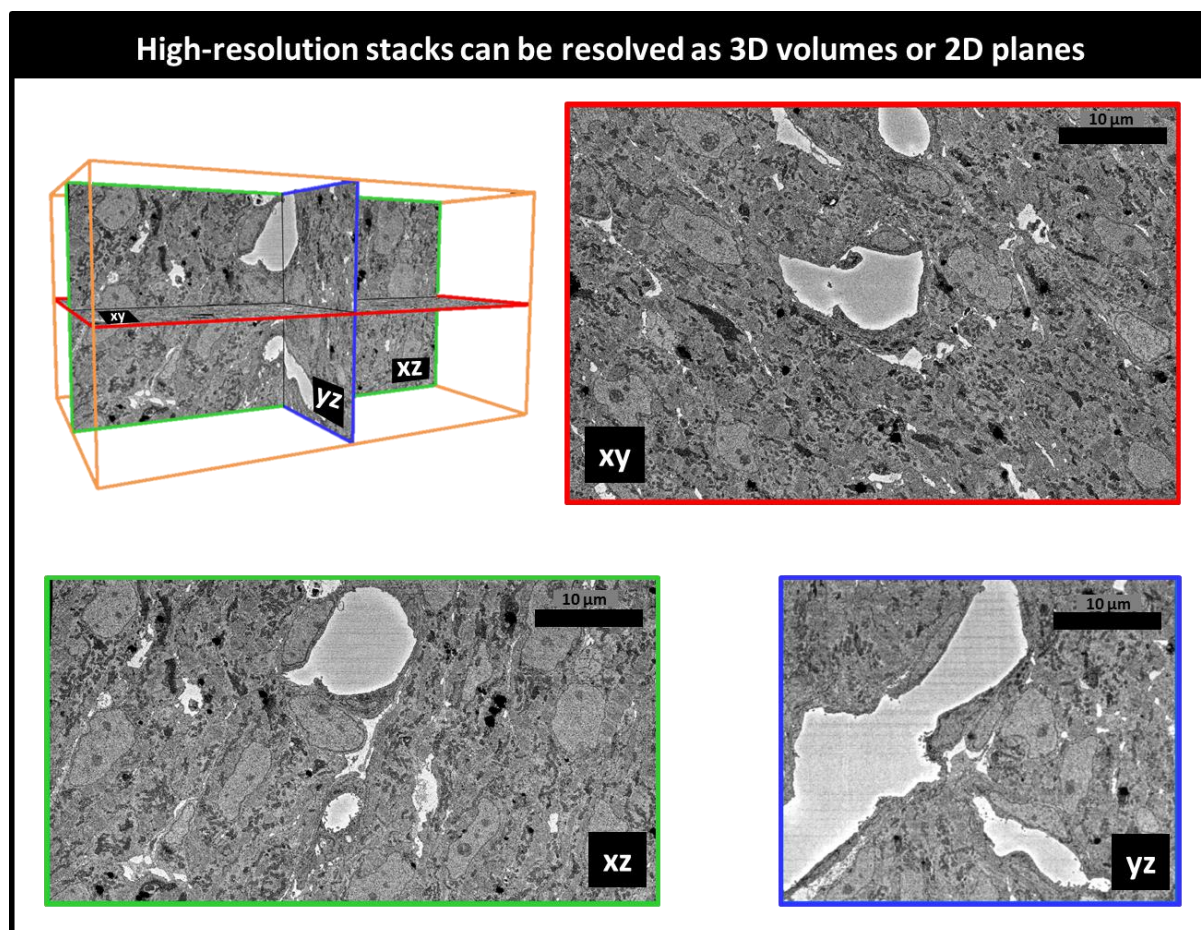

201  
202 **Figure 6:** Example 3D reconstruction of SBF-SEM image stack acquired from the control heart.  
203 **xy** is the imaging plane, acquired at 10 nm lateral resolution. **z** is the depth direction, with **xy**  
204 images acquired every 40 nm. **xz** and **yz** are reconstructed images depicting continuity of the  
205 image stack along the **z**-axis (depth). Scale bars = 10 microns.

206

207 Image segmentation and quantification:

208 To better visualize and quantify the cardiac ultrastructure, we segmented (delineated) from  
209 SBF-SEM images the cell nuclei, myofibrils, mitochondria, and the extracellular space. To this  
210 end, we used a combination of deep learning algorithms and tools available on the Dragonfly  
211 4.1 software (Object Research Systems, Quebec, Canada). When independently tested against  
212 carefully annotated images (2 each from control and TOF hearts, region A), the segmentation  
213 accuracy from the deep learning algorithm was at least 90% for myofibrils, 94% for mitochondria,  
214 and 98% for nuclei. Additional manual segmentation 'clean up' was thus required to improve the  
215 accuracy of organelle depictions. For quantification purposes, to control the accuracy of  
216 segmentations, we used subsets of the full SBF-SEM datasets by selecting images and regions  
217 within images from the complete dataset. From selected images and image regions, we  
218 quantified the percentage of the cell occupied by nuclei, myofibrils, and mitochondria. That is,  
219 we quantified selected organelle density within cells. We found that the density of nuclei,  
220 myofibrils and mitochondria was not significantly different between the control (CON) and TOF

221 hearts, nor between regions A and B (see **Figure 7A**). We also quantified the percentage of the  
222 image that was occupied by extracellular space. We found that the TOF heart exhibited more  
223 extracellular space than the CON heart in both regions A and B (see **Figure 7B**). This was also  
224 consistent with a visual inspection of segmented images (see **Figure 7C**). In addition, for both  
225 CON and TOF hearts, there was more extracellular space in region B than in region A ( $p < 0.05$ ).

226

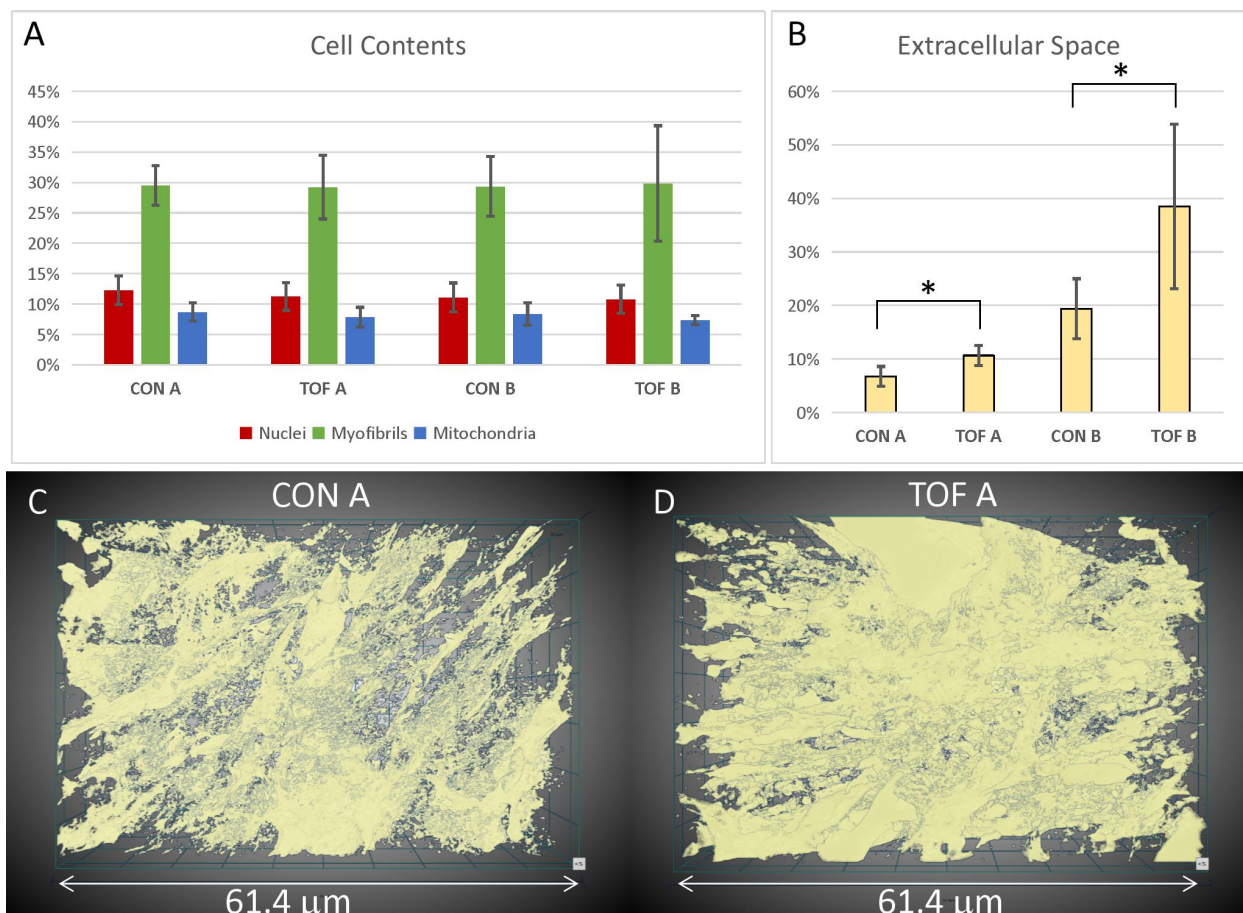

227

228 **Figure 7:** Segmentation and quantification of SBF-SEM images. Selected images ( $n \geq 10$ ) from  
229 the SBF-SEM image stacks acquired at regions A and B were carefully segmented and  
230 quantified. **(A)** Percentage of myocardial cells occupied by nuclei, myofibrils and mitochondria in  
231 two regions (A and B) of the control (CON) heart and TOF heart. **(B)** Percentage of the images  
232 occupied by extracellular space. \* indicates statistically significant differences ( $p < 0.05$ ).  
233 Although not marked, differences between regions A and B were also statistically significant. 3D  
234 views of the segmented extracellular space in **(C)** control (CON) heart, region A; and **(D)** TOF  
235 heart, region A.

236 Visualization of segmentations of the entire sub-ROIs from region A of the CON and TOF hearts  
237 revealed a slightly different orientation of myocardial cells between samples (**Figure 8**).

238

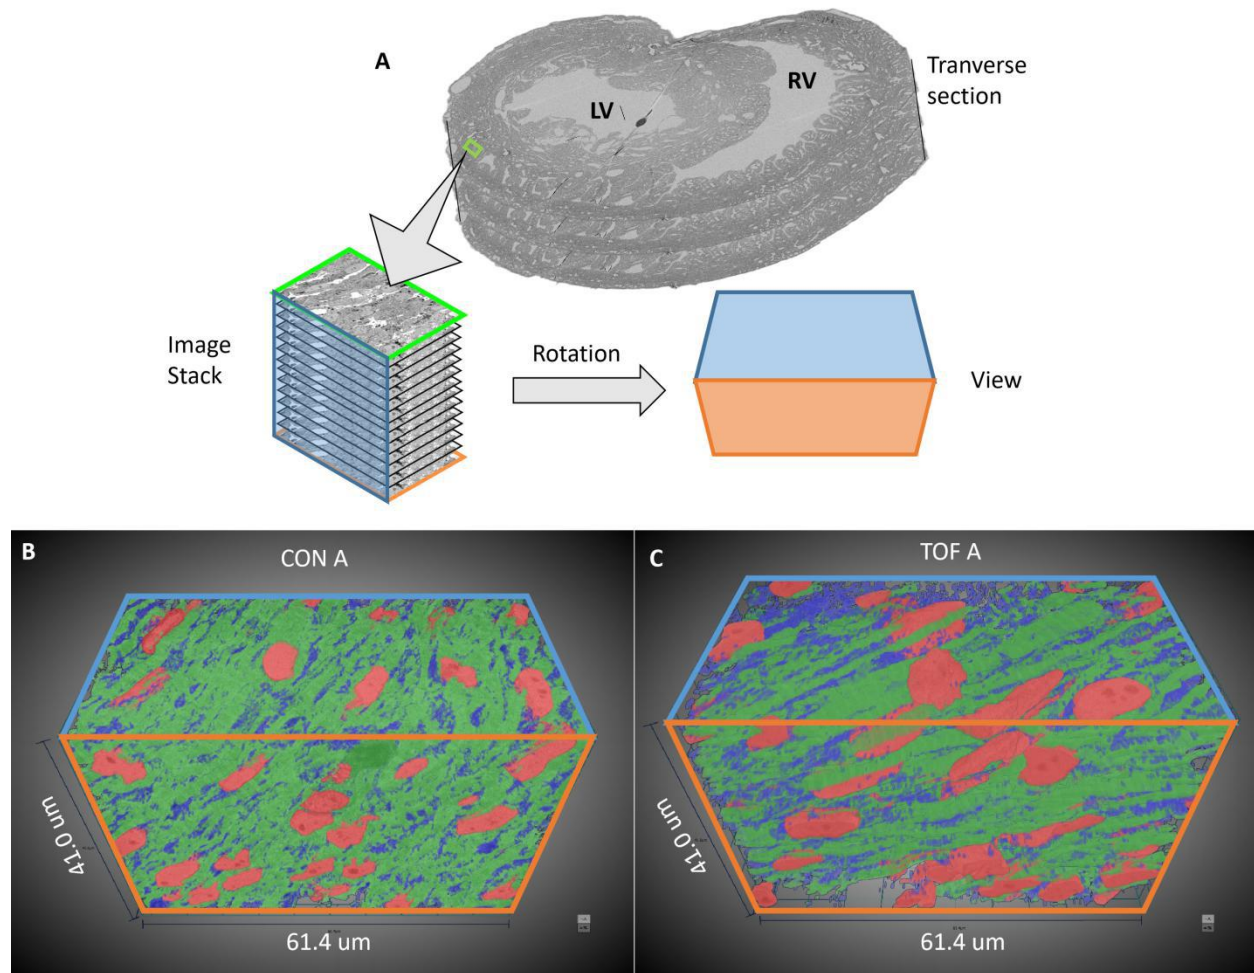

239

240 **Figure 8:** 3D visualization of SBF-SEM segmentations. **(A)** Sketch of image dataset acquisition,  
241 showing relative orientations. Green plane is the top image, orange plane is the bottom image  
242 (last image acquired), blue plane is approximately parallel to the heart wall. The sketch of the  
243 view shows the orientation of the planes as shown in **(B)** control (CON) heart and **(C)** TOF heart.

244

## 245 Discussion

246 Heart function relies on a multiscale, finely orchestrated contractile machinery. The heart  
247 ultrastructural organization is needed for efficient heart pumping and is linked to the cell  
248 metabolism<sup>23-25</sup>. Structural malformations in the chambers, valves or vessels of the heart,  
249 together with disruptions to the organization or number of cardiac cells, and/or their  
250 ultrastructure, can compromise the heart's ability to pump blood efficiently<sup>8,10,13,26,27</sup>. Anomalous  
251 structural and ultrastructural architectures can be detrimental to the heart's capacity to adapt to  
252 new conditions imposed by corrective surgeries or other therapies intended to repair structural  
253 congenital heart defects. Thus, the organization of the heart at multiple scales needs to be  
254 properly understood and accounted for in CHD treatment planning.

255 Heart walls contain myocardial cells, which are elongated, cylindrical-like muscle cells that are  
256 aligned in patterns that optimize cardiac contractility<sup>28,29</sup>. Myocardial cells are about 50-150µm  
257 long and 10-20µm thick (diameter), and in the heart are connected to each other forming a 3D  
258 network<sup>11</sup>. More specifically, myocardial cells are organized in laminar sheets that exhibit  
259 characteristic cell orientations (elliptical and transmural angles), which change over the heart  
260 wall thickness and the cardiac cycle<sup>11,30</sup>. At the ultrastructural level, myocardial cells contain  
261 contractile units, the myofibrils, which are supplied with energy (ATP) by the mitochondria  
262 surrounding them. In a healthy, mature heart, myocardial nuclei have an ellipsoidal shape  
263 aligned with the cell long axis; myofibrils are meticulously aligned and organized along the  
264 myocardial cells; and mitochondria are densely packed around the myofibrils<sup>16,29</sup>. Other  
265 organelles (such as lipid droplets and glycosomes) are organized around the cell myofibrils,  
266 mitochondria and nuclei<sup>31,32</sup>. While this organization may vary significantly from individual to  
267 individual, even in normal hearts, it ensures proper cardiac function. Multiscale studies of the  
268 heart, spanning whole organ to ultrastructural details, can reveal subtle deficiencies in CHD  
269 heart tissues, and relationships between abnormalities across spatial scales.

270 The correlative, multiscale imaging approach presented here was implemented and optimized in  
271 a chicken embryo model of heart development and CHD<sup>33</sup>. Heart dimensions ranged from  
272 approximately 5-6 mm long, 3-4 mm wide, and 250-700 µm wall thickness. We acquired images  
273 of the whole embryonic heart using 3D micro-CT and of cardiac ultrastructure using 3D SBF-  
274 SEM. Our multiscale imaging procedure achieved high-resolution images exhibiting both  
275 microstructural and ultrastructural preservation, while protocol completion was achieved in  
276 about 4 days, which is comparable to completion timings for much smaller samples<sup>34</sup>. Our  
277 multiscale imaging methodology will enable studies of yet unknown tissue deficiencies in CHD.

### 278 Our protocol in relation to previous works

279 Researchers have used EM techniques, including SEM, for decades to visualize the  
280 organization of organelles within cells<sup>20,35</sup>. In the heart, studies using EM have revealed the  
281 ultrastructural architecture of mature myocardial cells<sup>16,31</sup>, and elucidated the maturation of  
282 myocardial ultrastructure during embryonic development<sup>28,36,37</sup>. A few studies, moreover, have  
283 determined changes in ultrastructure due to pathophysiological conditions in the mature heart  
284<sup>13,26,27</sup>. Properly preparing samples for EM requires meticulous protocols that aim at preserving  
285 the ultrastructure of the tissue under study (e.g. intact cell and nucleus membranes,

286 mitochondria and their crystae, myofibrils and z-disks, etc). Because the ultrastructural features  
287 analyzed are at the nanometer scale, samples used for EM are typically very small ( $< 1\text{mm}^3$ ),  
288 which facilitates proper sample preparation. In preparing samples, portions of the heart are  
289 typically excised, carefully prepared for imaging (fixed and stained)<sup>14,38</sup>, and then imaged with  
290 an EM modality<sup>14,31</sup>. Using this procedure, however, finding the ultrastructure associated with a  
291 specific microscopic feature can be daunting. Moreover, in micro-dissecting tissue samples, the  
292 myocardial organization within the heart may be lost<sup>11</sup>. Our methodology enables correlative  
293 microscopy in a way that allows precise identification and mapping of portions of the heart to  
294 their ultrastructure.

295 Whole animals and organs have been scanned with computed tomography (CT), a 3D x-ray  
296 imaging modality, to determine the internal and external structure of organs, including the heart.  
297 For small animal models, micro-CT, a high-resolution CT, is typically employed<sup>33,39</sup>. To enhance  
298 contrast and thus resolution, prior to micro-CT imaging excised tissue samples are frequently  
299 stained<sup>33</sup>. Preparing samples for micro-CT imaging requires good and uniform penetration of  
300 the stain, intended to preserve and contrast the tissue microstructure (e.g., heart morphology,  
301 heart chambers and valves). Micro-CT can then reveal subtle and overt malformations in the  
302 heart and its microstructure<sup>33</sup>. For example, using micro-CT cardiac images it is possible to  
303 visualize ventricular septal defects or translocations of the great arteries, but also wall and  
304 septum thickness, and differentiate trabecular from compact myocardium<sup>33</sup>. The discrepancy in  
305 the scale at which micro-CT and SBF-SEM are acquired introduces fundamental differences in  
306 the requirements for sample preparation. Due to diverse fixation and staining protocols<sup>33,40</sup>,  
307 tissues prepared for micro-CT or other microstructural imaging (e.g. histology) cannot typically  
308 be simultaneously processed for SBF-SEM (and other EM modalities), thereby restricting the  
309 ability to analyze both the structural and ultrastructural characteristics within the same tissue  
310 sample. Our correlative micro-CT/SBF-SEM procedure can reveal the sub-cellular architecture  
311 associated with specific pathological or malformed regions of the heart found from micro-CT  
312 images.

313 Applications combining micro-CT and EM technologies have recently begun to emerge, e.g.<sup>41-43</sup>.  
314 However, several challenges remain in applying these methods to correlative, multiscale  
315 imaging of a relatively large organ like the heart (even the heart of a small animal). To achieve  
316 both EM and micro-CT high-quality imaging of the same sample, existing protocols have  
317 capitalized on heavy metal contrast in small tissue samples, which are fully processed prior to  
318 EM and micro-CT imaging, e.g.<sup>34,41</sup>. However, achieving the uniform staining necessary for  
319 optimal imaging with both micro-CT and SEM becomes progressively challenging with  
320 increasing tissue sample size. This is mainly due to difficulties in achieving uniform and fast  
321 fixation (that preserves the ultrastructure), and uniform stain penetration (both for post-fixation  
322 purposes and to enhance contrast for SEM and micro-CT imaging). Modifications to the classic  
323 ROTO protocols<sup>19-21</sup> for EM tissue preparation have been quite successful in achieving strong  
324 and uniform staining of relatively large samples<sup>44,45</sup>. However, acceptable staining was typically  
325 only up to a depth of 200  $\mu\text{m}$ , and more recently 500  $\mu\text{m}$ <sup>19</sup> in dense brain tissues. In an attempt  
326 to stain whole brains for EM reconstruction of synapses, Mikula et al. developed the brain-wide  
327 reduced-osmium staining with pyrogallol-mediated amplification (BROPA) protocol<sup>46</sup> for 3D  
328 SBF-SEM (no other heavy metals were used). While the protocol is compatible with both micro-

329 CT and 3D SBF-SEM imaging, preparing a whole mouse brain (about 8-10 mm in diameter)  
330 using BROPA required 2-3 months. A fast BROPA protocol (fBROPA) was later developed and  
331 used to prepare whole brains from zebrafish in about 4 days<sup>34</sup>. Zebrafish brains, however, are  
332 significantly smaller than mouse brains (diameter of 1.1 mm vs 8-10 mm, respectively). For our  
333 hearts, we needed to achieve stain penetration of a relatively large sample (5-6mm long, 3-4  
334 mm wide) and a fast preparation protocol was also desired. We found that preparing the heart  
335 for SBF-SEM and stopping the protocol after initial ROTO staining, was compatible with micro-  
336 CT and later SBF-SEM full sample processing and imaging. To our knowledge, this is the first  
337 time that correlative micro-CT/SBF-SEM imaging is applied to the heart.

### 338 Protocol implementation

339 Sample preparation for SBF-SEM required strong, immediate fixation to preserve the  
340 ultrastructure of the heart tissue. We used a modified Karnovsky's fixative with equal parts  
341 glutaraldehyde and paraformaldehyde: The paraformaldehyde rapidly penetrated and  
342 temporarily stabilized the tissue, and the slower-penetrating glutaraldehyde, a superior cross-  
343 linker, more permanently preserved the tissue sample<sup>35</sup>. An obvious difficulty was to achieve  
344 uniform fixation of the whole heart sample. Homogenous fixation was achieved by perfusing  
345 fixative into the heart prior to excision and then promptly immersing the heart in fixative after  
346 excision, allowing the fixative to simultaneously penetrate the heart through the tissue's internal  
347 and external surfaces. The hearts were then post-fixed with osmium tetroxide, a lipid cross-  
348 linker, which fully stabilized membrane structures while enhancing contrast for micro-CT and  
349 SBF-SEM imaging. For our heart samples, we could achieve uniform stain penetration using a  
350 variation of the ROTO protocol with extended staining timing (about 30% increase; see  
351 Methods). The extended timing was sufficient for our hearts, even considering small size  
352 variations. We expect, however, that further time increases would apply to larger heart samples  
353 (for instance if we image embryos at a more advanced developmental stage, or other species  
354 are considered). For the chick embryos studied here, sample preparation after ROTO was  
355 adequate for micro-CT imaging of the whole heart (see **Figure 2**).

356 For 3D SBF-SEM images, heart samples were further stained with a combination of heavy  
357 metals. This is because SEM images are acquired via the detection of secondary and  
358 backscattered electrons that are emitted as the tissue is scanned with a high energy beam of  
359 primary electrons<sup>47</sup>. Soft biological tissues, like the heart muscle, yield few backscattered  
360 electrons and need to be stained with heavy metals, which readily produce secondary and  
361 backscattered electrons. Heavy metal stains interact with specific ultrastructural components,  
362 and therefore combinations of stains are frequently used in a single sample. The application of  
363 osmium tetroxide, used in ROTO protocols, served as the first application of a heavy metal stain  
364 in the SBF-SEM preparation. The osmium tetroxide, which interacts with lipids in membranes  
365 and vesicles, both post-fixed and stained tissues. Further staining with uranyl acetate stained  
366 lipids and proteins, and lead aspartate stained proteins and glycogens. Together, these heavy  
367 metal stains fully preserved and contrasted ultrastructural details, as evidenced by high-  
368 resolution SBF-SEM images (see **Fig. 5**).

369 For whole-heart samples, we found that staining with uranyl acetate and lead aspartate  
370 rendered resin-embedded hearts opaque to micro-CT imaging (data not shown). Our multiscale  
371 multimodality imaging procedure overcame these difficulties by performing micro-CT imaging  
372 after ROTO (see above) but prior to the lead and uranium staining steps, such that correlative  
373 3D micro-CT and 3D SBF-SEM could be implemented. This initial modified ROTO post-fixing  
374 and staining provided tissue contrast for micro-CT while also ensuring that the sample was  
375 preserved and stabilized before final SBF-SEM sample preparation and imaging (see **Figure 1**).  
376 In addition, it enabled screening, storing and selection of hearts before final SBF-SEM  
377 processing. This feature of our multiscale approach is advantageous for several reasons. At this  
378 early processing point, hearts could be stored for relatively long periods (at least 2 weeks, but  
379 potentially months/years) before further processing. This allows researchers to prepare and  
380 screen by micro-CT a large number of hearts, and then select only those hearts of interest (e.g.  
381 with a specific malformation) for further analysis with SBF-SEM. Not only does this approach  
382 permit banking of samples, but it also saves considerable time and resources by avoiding full  
383 sample preparation of hearts that are not useful. This is important for our application, in which at  
384 most 60% of treated hearts develop structural malformations, and the nature and severity of  
385 defects vary among individual hearts. Since we cannot accurately classify malformations until  
386 they are scanned with micro-CT, being able to use the micro-CT as both a screening tool and as  
387 a navigational tool for later correlative microscopy is invaluable to CHD studies.

388 Due to the size of the hearts and slow diffusion (penetration) of heavy metals into the tissue,  
389 achieving uniform staining during further SBF-SEM tissue processing was not straightforward.  
390 Initial iterations of the procedure (data not shown) resulted in a strong gradient of staining into  
391 the heart tissue, a manifestation of poor stain penetration<sup>34,46</sup>. Application of microwave steps to  
392 enhance diffusion was not helpful, although perhaps optimizations of those steps could achieve  
393 improved results. We found, however, that following a Renovo Neural, Inc. protocol (see  
394 Methods) after ROTO and before embedding the sample in a resin capsule allowed the samples  
395 to achieve homogeneous staining. Uniform stain penetration throughout the heart, was apparent  
396 from semithin transverse sectional images of the heart and low-resolution images of ROIs (see  
397 **Figure 4**). The uniform contrast and resolution of ultrastructural details provided further  
398 evidence of uniform staining and proper tissue fixation (see **Figure 5**).

399 While the focus of this study was to demonstrate homogeneous staining and fixation, our  
400 procedure enables correlative microscopy. One way to achieve accurate localization of  
401 ultrastructures within the heart structure, is to register semithin transverse sections to micro-CT  
402 images, and then SBF-SEM images to the semithin images (as done in **Figure 4**). Because  
403 sectioning of samples for SBF-SEM imaging is done after micro-CT images are acquired,  
404 sectioning is guided by the images of the whole heart, facilitating the selection of regions of  
405 interest. Registration can then be performed among the images themselves. This could be done  
406 directly, or by adding fiducial markers in the resin/heart to facilitate image alignment. Our  
407 procedure allows imaging of ultrastructure at several regions of interest within the heart,  
408 enabling extensive ultrastructural mapping.

409 Comparison of control and TOF hearts and limitations of this study



410 We further explored some possible analysis and quantification strategies enabled by our  
411 procedure. We acknowledge that any results from this study are very preliminary, and any  
412 statistically significant differences show here pertain only to the two hearts studied. Analysis of  
413 more heart samples is needed to reach conclusions applicable to CHD. In the future, a  
414 combination of segmentation, quantification and other refined methods to interrogate the images  
415 (at the microstructural and ultrastructural levels) will elucidate similarities and differences  
416 between normal and malformed hearts, possibly informing therapeutic treatment strategies.

417 Micro-CT images reveal the microstructural characteristics of hearts. Not only could we classify  
418 the hearts based on phenotype (normal vs TOF), but (while not reported here) cardiac  
419 characteristics, such as heart size and wall thickness could be visualized and quantified. For  
420 example, it was noted from our analysis that the RV of the TOF heart exhibited a larger volume  
421 and thinner ventricular walls than that of the control (CON) heart examined here (see **Figure 3**).  
422 During fetal life, the lungs are not functional, and blood to the lungs is shunted to the systemic  
423 circulation through the ductus arteriosus<sup>48</sup> (a pair of ducti in chick<sup>49</sup>). The RV hypertrophy  
424 characteristic of TOF, develops over time after the baby is born<sup>50</sup>. RV hypertrophy, therefore,  
425 may not be present at the fetal stages of heart development examined in this study and was not  
426 observed in our TOF heart. In the future, it would be interesting to determine whether the trait  
427 observed in this study is preserved among TOF fetal hearts, and if so under which conditions  
428 and how it affects the RV wall ultrastructure (not examined here). Such study, however, requires  
429 a larger number of heart samples, and is outside of the scope of this paper.

430 Another difference between the two hearts, was that the ventricles of the TOF heart exhibited  
431 less dense tissue and a more extended trabecular architecture compared with the control heart.  
432 This is consistent with reduced myocardial compaction in TOF<sup>51-53</sup>. The heart trabeculae is  
433 characterized as a “spongy” or porous tissue that develops inside the heart ventricles, and in  
434 our samples was evident from semithin transverse heart sections (**Figure 4**), but could also be  
435 approximately quantified as the extracellular portion of the images (**Figure 7**). It has been  
436 shown that the heart trabecular architecture is sensitive to blood flow conditions during  
437 development<sup>54</sup>, and thus a disrupted trabecular architecture may be a characteristic of TOF  
438 hearts due to their anomalous flow characteristics during fetal stages<sup>18</sup>. However, the  
439 trabecular and myocardial architecture can also exhibit variations from heart to heart<sup>11</sup>,  
440 therefore further analysis with a larger sample size is required before we can make conclusions  
441 related to TOF.

442 We noticed differences in SBF-SEM image sharpness, which are attributable to excessive  
443 ‘charging’ (accumulation of static charge on a sample’s surface) when scanning the TOF heart  
444 (**Figure 5**). The increased charging in our TOF heart is linked to its trabeculation, which features  
445 larger and more numerous void regions filled with free resin. To address this problem during  
446 imaging, we slightly shortened the dwell time when acquiring SBF-SEM images from the TOF  
447 sample. In the future, we could embed silver particles in the resin to increase sample  
448 conductivity and enhance image quality<sup>34</sup>. Nevertheless, the image quality of both the TOF and  
449 the control hearts was sufficient to appreciate ultrastructural details (**Figure 5**).

450 While 2D EM images have been invaluable in deciphering ultrastructural features of myocardial  
451 cells and tissues, 3D images can unravel more details in the spatial organization of the  
452 ultrastructural architecture<sup>16,26</sup>. As an example, segmentation and visualization of the 3D data  
453 revealed that myofibril alignment was slightly different between our TOF and control hearts  
454 (**Figure 8**). This is perhaps because the ROIs from the two hearts are not exactly corresponding,  
455 or due to the more extended trabecular architecture of the TOF heart, and warrants further  
456 investigation. For myocardial alignment quantification, it is also important to arrest the heart  
457 consistently (in diastole as done here, or systole) as myocardial cell orientation changes over  
458 the cardiac cycle<sup>12,30</sup>. 3D SBF-SEM images also revealed a greater proportion of endocardial  
459 cells in TOF heart tissues than in control tissues, such that volumetric studies not focusing on  
460 myocardial cells show reductions in the myofibril density of the TOF heart (data not shown).  
461 When the analysis is focused exclusively on myocardial cells, however, we could not find any  
462 differences in the density of myofibrils or mitochondria (**Figure 7**). While outside the scope of  
463 this paper, future studies should focus on elucidating ultrastructural cardiac differences in  
464 animal models of CHD as such differences can impact the lives of children and adults with  
465 congenital heart defects. Our proposed multiscale imaging methodology will certainly enable  
466 such studies.

467

## 468 **Conclusions**

469 Our correlative, multiscale imaging procedure allowed us to acquire detailed micro-CT images  
470 of an entire embryonic chicken heart (see **Figure 2**), followed by ultrastructural 3D SBF-SEM  
471 images from the same heart (see **Figures 4 and 5**). Our approach thus enables detailed  
472 analysis of both whole heart morphology and ultrastructural architecture, allowing determination  
473 of cardiac malformations and subcellular organization within specific regions of the heart. This is  
474 important when studying CHDs, as each malformation phenotype may be different and therefore  
475 may need to be analyzed separately to fully appreciate multiscale effects and to understand  
476 how phenotypes affect cardiac architecture at disparate levels. The multiscale imaging  
477 approach presented here will enable studies to determine how cardiac anomalies, even when  
478 repaired, could subsequently lead to increased cardiac dysfunction and heart failure. For  
479 patients with CHD, such studies may reveal associated pathologies in cardiac tissues that, if not  
480 properly treated, may have devastating implications for survival and long term cardiac health.

481 While our developed multiscale approach was implemented and optimized using embryonic  
482 chicken hearts, we expect it will be straightforward to adapt it for use in mouse and other small  
483 animal models of cardiac malformations. It will be advantageous to use complementary models,  
484 as typically genetic insults are studied using mouse models, while environmental perturbations  
485 are studied using avian models. Heart dimensions in those species (mouse and chick) are very  
486 similar, and we anticipate that tissue processing will not differ significantly. Slight increases in  
487 heart size may just require an increase in protocol staining times. Extending the approach to  
488 different species and models of congenital heart disease will enable us to understand in detail  
489 the similarities and differences between cardiac defects, and the underpinnings of  
490 malformations that result from genetic and environmental insults.

## 491 **Methods**

### 492 Ethical Considerations:

493 Our research used chicken embryos. According to the US National Institutes of Health (NIH)  
494 Office of Laboratory Animal Welfare ([ILAR News](#) 1991; 33(4):68-70), the NIH's "Office for  
495 Protection from Research Risks has interpreted 'live vertebrate animal' to apply to avians only  
496 after hatching." Our Institutional animal care and use committee (IACUC) follows NIH  
497 interpretation. Therefore, chicken embryos are not considered animals and our research did not  
498 require approval. Incubator logs in the lab were monitored daily to ensure there were no eggs  
499 near the hatching time of 21 incubation days. Nevertheless, we used the minimum possible  
500 number of embryos to achieve our goals.

### 501 Generation of cardiac defects:

502 Our multiscale approach was implemented and optimized using fully formed embryonic chicken  
503 hearts (heart length ~5-6mm), and applied to a chick animal model of congenital heart disease.  
504 Chicken embryos were prepared as described previously<sup>33</sup>. Briefly, fertilized white Leghorn  
505 chicken eggs were incubated blunt end up at 38°C and 80% humidity for approximately 3 days  
506 (to Hamburger and Hamilton (HH) stage HH18<sup>55</sup>). Control and treatment interventions were  
507 then performed as described below and the embryos were re-incubated for an additional 9 days  
508 (to HH38, when the heart has four chambers and valves). Two embryonic hearts were included  
509 in this study: 1) a control, normal heart; and 2) a malformed heart with tetralogy of Fallot (TOF).  
510 TOF was achieved by performing outflow tract banding (OTB) at HH18, wherein a 10-0 nylon  
511 suture was passed under the mid-section of the heart outflow tract and tied in a knot (band  
512 tightness 38%). The band was removed from the outflow tract ~24 hours after placement  
513 (HH24), and then the embryo was allowed to develop to HH38. The control heart was obtained  
514 by passing a 10-0 nylon suture under the heart outflow tract without knotting it, and  
515 subsequently allowing the embryo to develop to HH38. Embryo hearts were collected at HH38  
516 for multiscale imaging.

### 517 Homogenous fixation of whole hearts:

518 At HH38, embryonic whole hearts were excised and fixed as follows. The chest cavity was  
519 opened and the pericardial sac around the heart gently removed with forceps. Each heart was  
520 arrested by injecting 500 µL of chick ringer solution containing 60 mM KCl, 0.5 mM verapamil,  
521 and 0.5 mM EGTA<sup>56</sup> into the left ventricle through the heart's apex. Hearts were then  
522 immediately perfused with ~2 mL of ice-cold (0°C) modified Karnovsky's fixative (2.5%  
523 Glutaraldehyde and 2.5% PFA in PBS (pH 7.4)) through the same injection site. All perfusions  
524 were performed with a 21 gauge needle. A transfer pipette was used to quickly apply ~1 mL of  
525 fixative to the heart's exterior to ensure uniform fixation of the heart tissue. Next, the heart great  
526 vessels were cut with small spring scissors and hearts were placed in 1.5 mL fixative and stored  
527 at 4°C until further processing.

### 528 Cardiac processing enabling micro-CT imaging:

529 In order to enable both whole-heart micro-CT imaging and subsequent SBF-SEM imaging of  
530 regions of interest (ROIs), we processed fixed hearts for micro-CT using the initial portion of a  
531 Renovo Neural, Inc (Cleveland, USA) protocol <sup>38</sup> designed for SBF-SEM imaging (see **Figure 1**,  
532 **Step 1**). Each heart was placed in a 5 mL glass scintillation vial and we used 3 mL of solution  
533 per vial for each incubation/wash. First, the fixed hearts were washed in 0.1M Sodium  
534 Cacodylate (pH 7.4) for 20 minutes with 4 exchanges of fresh buffer. Next, the hearts were  
535 incubated in 0.1% (w/v) of tannic acid in 0.1M Sodium Cacodylate (pH 7.4) for 15 minutes at  
536 room temperature. Samples were then washed in 0.1M Sodium Cacodylate (pH 7.4) for 20  
537 minutes with 4 exchanges of fresh buffer. Since the reducing agents used in subsequent steps  
538 (modified ROTO protocol) were light-sensitive, the sample vials were covered in aluminum foil  
539 from this point on. The whole hearts were post-fixed in 2% (v/v) Osmium Tetroxide (OsO<sub>4</sub>) and  
540 1.5% (w/v) Potassium Ferricyanide (K<sub>3</sub>[Fe(CN)<sub>6</sub>]) in distilled water (dH<sub>2</sub>O) for 2 hours at room  
541 temperature on a rotating platform. The samples were then extensively washed in dH<sub>2</sub>O for 20  
542 minutes with 4 exchanges of fresh dH<sub>2</sub>O. Next, the samples were immersed in 0.1% (w/v)  
543 Thiocarbohydrazide (TCH) solution in dH<sub>2</sub>O, placed in an oven, and incubated for 40 minutes at  
544 60°C. This step was followed by another 4 exchanges of fresh dH<sub>2</sub>O over 20 minutes. Samples  
545 were then immersed in a 2 % (v/v) OsO<sub>4</sub> solution in dH<sub>2</sub>O for 2 hours at room temperature on a  
546 rotating platform. Finally, the hearts were washed extensively in dH<sub>2</sub>O over 20 minutes with 4  
547 exchanges of fresh water. Each heart was stored in dH<sub>2</sub>O at 4°C until imaged by micro-CT. This  
548 preparation provided excellent contrast for micro-CT scans (see Results).

549 Micro-CT images of whole hearts were acquired to assess the cardiac structure. We acquired  
550 high-resolution (~10 µm) 3D scans of each heart using a Caliper Quantum FX Micro-CT system  
551 (Perkin-Elmer, CLS140083) with 10 mm field of view, 140 µA current, 90 kV voltage, and a scan  
552 time of 3 minutes. We used the Amira 6.0 software platform (FEI Company) to visualize these  
553 scans and identify cardiac defects. Hearts were then stored in double distilled water at 4°C until  
554 further processing. Please note that at this step in the processing (cardiac tissues fixed and  
555 post-fixed with OsO<sub>4</sub>) water does not damage the tissues.

#### 556 Subsequent cardiac tissue processing enabling 3D SBF-SEM imaging:

557 After whole hearts were imaged with micro-CT, sample preparation of selected hearts for 3D  
558 SBF-SEM imaging was finished (see **Figure 1; Step 2**), following the Renovo Neural, Inc.  
559 protocol. In large samples, like the whole hearts described in this manuscript, it is necessary to  
560 extend most of the staining steps. Failure to extend the timing of staining resulted in a  
561 heterogenous stain distribution throughout the tissue (in our early iterations of the procedure). In  
562 our final, optimized procedure, we incubated the samples in 1% (w/v) aqueous uranyl acetate  
563 for 24 hours at 4°C, after which they were washed in dH<sub>2</sub>O for 30 minutes with 6 exchanges of  
564 fresh dH<sub>2</sub>O. We then incubated the samples in lead aspartate for 30 minutes at 60°C. The  
565 samples were then extensively washed in dH<sub>2</sub>O for 20 minutes with 4 exchanges of dH<sub>2</sub>O.  
566 Dehydration steps were done in a series of acetone-dH<sub>2</sub>O mixtures (50, 75, 85, 95 and 100%);  
567 each step was repeated twice for 5 minutes at room temperature. The whole heart sample was  
568 then embedded in an epoxy (Epon 812) resin for further manipulation and SBF-SEM sample  
569 preparation. The first infiltration step was done for 1 hour at room temperature in a mixture of  
570 1:1 (v/v) acetone:epon followed by a 1:3 (v/v) acetone:epon incubation for 1 hour at room

571 temperature. The hearts were subsequently incubated overnight in pure (100%) epon on a  
572 rotating platform. The following day the epoxy solution was exchanged 4 times, each time with  
573 30 minutes incubation steps at room temperature. Samples were polymerized at 60°C for 48  
574 hours in a conventional oven, leading to a whole heart sample embedded in an Epon block.

#### 575 Selection of regions of interest (ROIs) and SBF-SEM image acquisition:

576 Using the micro-CT images as reference, the Epon-embedded heart blocks were sectioned to  
577 reach a selected short axis (transverse) section using a diamond-wire jewelry saw. For this  
578 study we selected the mid cardiac transverse section, at a plane where the heart is wider (the  
579 equatorial plane). After this step, a semithin section (250 nm) was obtained using an  
580 ultramicrotome and mounted on a silicon chip previously glow discharged for 1 minute at 15 mA  
581 (PELCO easyGlow, Ted Pella). Semithin section images were used to confirm the area of  
582 interest as well as to check for both the ultrastructural quality of the sample and the success of  
583 the staining procedure (see **Figure 1; Step 2**). This step is crucial since the SBF-SEM imaging  
584 requires samples with extremely good contrast. Semithin sections were imaged on a Teneo  
585 Volume Scope in low vacuum mode using a VS-DBS backscattered electron detector and the  
586 MAPS software (FEI Company). Imaging conditions used were 2.5 kV and 0.2 mA, dwell 3-5  $\mu$ s.  
587 In some cases, the samples imaged using this method needed to be coated with a thin (5-8 nm)  
588 layer of carbon to minimize charging artifacts induced by the electron beam.

589 The same diamond-wire jewelry saw was then utilized to generate a slab (~1.5 mm) from the  
590 sample (see **Figure 1; Step 3**). The slabs were sectioned into smaller ROIs, which were  
591 subsequently mounted on Microtome stub SEM pins (Agar Scientific 61092450) using H20E  
592 Epo-Tek silver epoxy (Ted Pella 16014) and cured overnight at 60°C in a conventional oven.  
593 The resulting small blocks were then trimmed using a Trim90 diamond knife (Diatome) to  
594 generate a pillar of 500x500  $\mu$ m<sup>2</sup>. The block was then coated with 20 nm of gold using a Leica  
595 ACE 600 unit.

596 In the last step of our multiscale imaging procedure, 3D SBF-SEM images of sub-ROIs selected  
597 from the mounted sample were acquired (see **Figure 1; Step 4**). 3D image acquisition was  
598 done on a Teneo Volume Scope SBF-SEM in low vacuum mode (50 Pa) using a VS-DBS  
599 backscattered detector. Images were acquired at a lateral resolution of 10 nm/pixel and image  
600 sets included 800-1000 serial sections (with each section thickness measuring 40 nm in the z  
601 axis). SBF-SEM data sets were approximately 40  $\mu$ m  $\times$  60  $\mu$ m  $\times$  32-40  $\mu$ m.

#### 602 Image Analysis and Segmentation:

603 All registration, of SBF-SEM data was performed with Amira 6.0 (FEI Company). First, complete  
604 image stacks (800-1000 slices) from each ROI and sub-ROIs were automatically aligned to  
605 generate a continuous 3D volume. Next, a non-local means filter was applied to every 2D slice  
606 in order to improve the signal-to-noise ratio. Due to slight differences in the intrinsic properties of  
607 the tissue, sections from the TOF heart appeared slightly lighter compared to the control heart.  
608 We adjusted the intensity of the TOF sections during post-processing to match that of the  
609 control heart.

610 To better appreciate ultrastructural differences between the two hearts, we used Dragonfly 4.1  
611 software (Object Research Systems, Quebec, Canada) to segment and quantify SBF-SEM  
612 images. We segmented: cell nuclei, mitochondria, myofibrils and the extracellular space (this  
613 later one to allow quantification of relative organelle volume within cells). The segmentation  
614 used a combination of tools in Dragonfly, including deep learning algorithms. Briefly, we  
615 employed a six-level U-Net deep learning model<sup>57</sup> implemented in Dragonfly to perform an  
616 initial segmentation of nuclei, mitochondria, and myofibrils within imaged cells. Training sets  
617 required for the deep learning model were obtained initially through manual segmentations of a  
618 few selected images from the image stacks. The training set was later augmented by applying  
619 the segmentation deep learning algorithms to other (selected) images from the set, follow by  
620 thorough manual cleaning. For each training session, the model was run for 50 epochs with a  
621 patch size of 128 pixels. Dragonfly automatically divides the training sets into training and  
622 validation regions, so that training (and further inclusion of training images) continued until the  
623 reported accuracy (from validation regions) was > 98% with a loss < 0.06. Images were then  
624 segmented with the trained model, and segmentations further refined both using Dragonfly  
625 automated tools, such as morphological operations, and manual clean up using painter tools  
626 available in Dragonfly. Unlike organelles, the extracellular space was easily recognized by  
627 intensity levels, and thus simply segmented based on its intensity, followed by clean up using  
628 both automatic and manual tools in Dragonfly.

629 For visualization purposes, we segmented a whole dataset from the control heart and an  
630 approximately corresponding dataset from the TOF heart (region A, **Figure 8**). The total volume  
631 of the dataset was  $40 \times 60 \times 32 \mu\text{m}^3$ . For quantification purposes, we segmented and further  
632 curated smaller portions of the data sets from two corresponding regions of the control and the  
633 TOF hearts (regions A and B). Quantifications of extracellular space and nuclei were done from  
634 17 evenly spaced images from the 800 image datasets of region A; and 21 evenly spaced  
635 images from the 1000 image datasets of region B (thus every 50<sup>th</sup> image was used for these  
636 segmentations). For quantification of mitochondria and myofibrils, we cropped images ( $n \geq 10$ )  
637 so that we could focus on smaller regions, allowing us to manually improve the accuracy of  
638 segmentations in a more tractable manner and focusing on myocardial regions.

639 Quantifications were performed based on segmented images. We quantified, from each image  
640 or image portion, the total surface area ( $S_T$ ), and the surface area occupied by extracellular  
641 space ( $S_E$ ), nuclei ( $S_N$ ), mitochondria ( $S_{Mit}$ ) and myofibrils ( $S_{Myo}$ ). We then computed the fraction  
642 of the total surface area occupied by the extracellular space ( $S_E/S_T$ ); and the fraction of the cell  
643 occupied by organelles (nuclei, mitochondria and myofibrils), computed as the ratio of organelle  
644 surface ( $S_i$ , with  $i = N, Mit, Myo$ ) to the cell surface ( $S_i/(S_T - S_E)$ ). Because quantifications were  
645 performed from different portions ( $n \geq 10$ ) of the dataset, average and standard deviations were  
646 calculated to represent quantifications for the dataset (control or TOF hearts, regions A and B).  
647 We then employed a one tail T-test to compare quantifications among datasets, with  $p < 0.05$   
648 indicating significant differences.

649

650

## 651 **Acknowledgements**

652 This work has been funded by a grant from US National Institutes of Health, NIH R01 HL094570  
653 (SR); the OHSU University Shared Resource pilot funding program (SR); the OHSU School of  
654 Medicine Faculty Innovation Fund (SR). We would like to thank Kevin Loftis for graciously  
655 sharing his time and knowledge of Amira. We would also like to thank Melissa Williams for her  
656 help in optimizing our sample preparation and Renovo Neural, Inc, especially Emily Benson and  
657 Grahame Kidd, for sharing their SBF-SEM protocol. Electron microscopy was performed at the  
658 OHSU Multiscale Microscopy Core (MMC) with technical support from the OHSU Center for  
659 Spatial Systems Biomedicine (OCSSB).

660 An extended abstract (2 pages) of this work was published and presented at Microscopy &  
661 Microanalysis 2019 Meeting in Portland, OR,  
662 [https://www.cambridge.org/core/journals/microscopy-and-microanalysis/article/multiscale-](https://www.cambridge.org/core/journals/microscopy-and-microanalysis/article/multiscale-cardiac-imaging-from-whole-heart-images-to-cardiac-ultrastructure/7053ED929882C2E43B2ED85FD6D78BEC)  
663 [cardiac-imaging-from-whole-heart-images-to-cardiac-](https://www.cambridge.org/core/journals/microscopy-and-microanalysis/article/multiscale-cardiac-imaging-from-whole-heart-images-to-cardiac-ultrastructure/7053ED929882C2E43B2ED85FD6D78BEC)  
664 [ultrastructure/7053ED929882C2E43B2ED85FD6D78BEC.](https://www.cambridge.org/core/journals/microscopy-and-microanalysis/article/multiscale-cardiac-imaging-from-whole-heart-images-to-cardiac-ultrastructure/7053ED929882C2E43B2ED85FD6D78BEC)

665

## 666 **Author Contributions**

667 G.R. prepared the samples, acquired micro-CT images, and analyzed micro-CT and EM images.  
668 C.S.L and J.L.R. optimized the sample preparation protocols and acquired the EM images. I.F.  
669 segmented and quantified the SBF-SEM images. S.D. segmented micro-CT images for  
670 comparison. K.C. analyzed images and assisted G.R. with figures. A.M and K.T. analyzed the  
671 quality of images and helped with biological image interpretation. S.R. conceived the project,  
672 and wrote the first draft of the manuscript. All authors reviewed and edited the manuscript.

673

## 674 **Competing Interests**

675 The authors declare no competing interests.

676

## 677 **Data Availability**

678 Data, including micro-CT and SBF-SEM images, will be available to researchers upon request.  
679 Protocols employed are fully disclosed and detailed in the manuscript methods section.

680

681

## 682 References

- 683 1 Gilboa, S. M., Salemi, J. L., Nembhard, W. N., Fixler, D. E. & Correa, A. Mortality resulting from  
684 congenital heart disease among children and adults in the United States, 1999 to 2006.  
685 *Circulation* **122**, 2254-2263, doi:10.1161/CIRCULATIONAHA.110.947002 (2010).
- 686 2 van der Linde, D. *et al.* Birth Prevalence of Congenital Heart Disease WorldwideA Systematic  
687 Review and Meta-Analysis. *Journal of the American College of Cardiology* **58**, 2241-2247,  
688 doi:10.1016/j.jacc.2011.08.025 (2011).
- 689 3 Czosek, R. J. & Anderson, J. B. Congenital heart disease and the cost of mortality. *Open Heart* **3**,  
690 e000448, doi:10.1136/openhrt-2016-000448 (2016).
- 691 4 Gilljam, T. *et al.* Development of heart failure in young patients with congenital heart disease: a  
692 nation-wide cohort study. *Open heart* **6**, e000858-e000858, doi:10.1136/openhrt-2018-000858  
693 (2019).
- 694 5 Oster, M. E. *et al.* Temporal Trends in Survival Among Infants With Critical Congenital Heart  
695 Defects. *Pediatrics* **131**, e1502-e1508, doi:10.1542/peds.2012-3435 (2013).
- 696 6 Stout, K. K. *et al.* Chronic Heart Failure in Congenital Heart Disease. *A Scientific Statement From*  
697 *the American Heart Association*, doi:10.1161/cir.0000000000000352 (2016).
- 698 7 Sugimoto, M. *et al.* Cardiac biomarkers in children with congenital heart disease. **11**, 309-315,  
699 doi:10.1007/s12519-015-0039-x (2015).
- 700 8 Garcia-Canadilla, P. *et al.* Myoarchitectural disarray of hypertrophic cardiomyopathy begins pre-  
701 birth. *Journal of Anatomy* **0**, doi:10.1111/joa.13058 (2019).
- 702 9 Stephenson, R. S. *et al.* High-Resolution Contrast-Enhanced Micro-Computed Tomography to  
703 Identify the Cardiac Conduction System in Congenitally Malformed Hearts. *Valuable Insight*  
704 *From a Hospital Archive* **11**, 1706-1712, doi:10.1016/j.jcmg.2018.05.016 (2018).
- 705 10 Garcia-Canadilla, P. *et al.* Complex Congenital Heart Disease Associated With Disordered  
706 Myocardial Architecture in a Midtrimester Human Fetus. *Circulation: Cardiovascular Imaging* **11**,  
707 e007753, doi:doi:10.1161/CIRCIMAGING.118.007753 (2018).
- 708 11 Gilbert, S. H., Benson, A. P., Li, P. & Holden, A. V. Regional localisation of left ventricular sheet  
709 structure: integration with current models of cardiac fibre, sheet and band structure☆.  
710 *European Journal of Cardio-Thoracic Surgery* **32**, 231-249, doi:10.1016/j.ejcts.2007.03.032  
711 (2007).
- 712 12 Omann, C. *et al.* Resolving the natural myocardial remodelling brought upon by cardiac  
713 contraction; a porcine ex-vivo cardiovascular magnetic resonance study of the left and right  
714 ventricle. *Journal of Cardiovascular Magnetic Resonance* **21**, 35, doi:10.1186/s12968-019-0547-2  
715 (2019).
- 716 13 Sanchez-Quintana, D., Climent, V., Ho, S. Y. & Anderson, R. H. Myoarchitecture and connective  
717 tissue in hearts with tricuspid atresia. *Heart* **81**, 182-191, doi:10.1136/hrt.81.2.182 (1999).
- 718 14 Rennie, M. Y., Gahan, C. G., López, C. S., Thornburg, K. L. & Rugonyi, S. 3D Imaging of the Early  
719 Embryonic Chicken Heart with Focused Ion Beam Scanning Electron Microscopy. *Microscopy and*  
720 *Microanalysis* **20**, 1111-1119, doi:doi:10.1017/S1431927614000828 (2014).
- 721 15 Midgett, M., López, C. S., David, L., Maloyan, A. & Rugonyi, S. Increased Hemodynamic Load in  
722 Early Embryonic Stages Alters Myofibril and Mitochondrial Organization in the Myocardium.  
723 *Frontiers in Physiology* **8**, doi:10.3389/fphys.2017.00631 (2017).
- 724 16 Hussain, A. *et al.* An Automated Workflow for Segmenting Single Adult Cardiac Cells from Large-  
725 Volume Serial Block-Face Scanning Electron Microscopy Data. *bioRxiv*, 242701,  
726 doi:10.1101/242701 (2018).
- 727 17 Bailliard, F. & Anderson, R. H. Tetralogy of Fallot. *Orphanet journal of rare diseases* **4**, 2-2,  
728 doi:10.1186/1750-1172-4-2 (2009).



- 729 18 Wiputra, H. *et al.* Human fetal hearts with tetralogy of Fallot have altered fluid dynamics and  
730 forces. *American Journal of Physiology-Heart and Circulatory Physiology* **315**, H1649-H1659,  
731 doi:10.1152/ajpheart.00235.2018 (2018).
- 732 19 Hua, Y., Laserstein, P. & Helmstaedter, M. Large-volume en-bloc staining for electron  
733 microscopy-based connectomics. *Nature Communications* **6**, 7923, doi:10.1038/ncomms8923  
734 (2015).
- 735 20 Malick, L. E., Wilson, R. B. & Stetson, D. Modified Thiocarbonylhydrazide Procedure for Scanning  
736 Electron Microscopy: Routine use for Normal, Pathological, or Experimental Tissues. *Stain*  
737 *Technology* **50**, 265-269, doi:10.3109/10520297509117069 (1975).
- 738 21 Willingham, M. C. & Rutherford, A. V. The use of osmium-thiocarbonylhydrazide-osmium (OTO)  
739 and ferrocyanide-reduced osmium methods to enhance membrane contrast and preservation in  
740 cultured cells. *Journal of Histochemistry & Cytochemistry* **32**, 455-460,  
741 doi:10.1177/32.4.6323574 (1984).
- 742 22 Reading, D. W. & Oza, U. Unilateral absence of a pulmonary artery: a rare disorder with variable  
743 presentation. *Proceedings (Baylor University. Medical Center)* **25**, 115-118 (2012).
- 744 23 Spotnitz, H., Sonnenblick, E. & Spiro, D. Relation of ultrastructure to function in the intact heart:  
745 Sarcomere structure relative to pressure volume curves of intact left ventricles of dog and cat.  
746 *Circulation Research* **XVIII**, 49-66 (1966).
- 747 24 Feuvray, D. in *Advances in Myocardiology: Volume 4* (eds E. Chazov, V. Saks, & G. Rona) 441-  
748 448 (Springer US, 1983).
- 749 25 Sahli Costabal, F. *et al.* Multiscale characterization of heart failure. *Acta Biomaterialia* **86**, 66-76,  
750 doi:<https://doi.org/10.1016/j.actbio.2018.12.053> (2019).
- 751 26 Pinali, C. *et al.* Three-dimensional structure of the intercalated disc reveals plicate domain and  
752 gap junction remodeling in heart failure. *Biophysical journal* **108**, 498-507,  
753 doi:10.1016/j.bpj.2014.12.001 (2015).
- 754 27 Holzem, K. M. *et al.* Mitochondrial structure and function are not different between nonfailing  
755 donor and end-stage failing human hearts. *The FASEB Journal* **30**, 2698-2707,  
756 doi:10.1096/fj.201500118R (2016).
- 757 28 Fischman, D. A. An Electron Microscope Study of Myofibril Formation in Embryonic Chick  
758 Skeletal Muscle. *The Journal of Cell Biology* **32**, 557-575, doi:10.1083/jcb.32.3.557 (1967).
- 759 29 Brook, W. H., Connell, S., Cannata, J., Maloney, J. E. & Walker, A. M. Ultrastructure of the  
760 myocardium during development from early fetal life to adult life in sheep. *Journal of anatomy*  
761 **137 ( Pt 4)**, 729-741 (1983).
- 762 30 Sonnenblick, E. H., Ross, J., Covell, J. W., Spotnitz, H. M. & Spiro, D. The Ultrastructure of the  
763 Heart in Systole and Diastole. *Circulation Research* **21**, 423-431,  
764 doi:10.1161/01.RES.21.4.423 (1967).
- 765 31 Pinali, C. & Kitmitto, A. Serial block face scanning electron microscopy for the study of cardiac  
766 muscle ultrastructure at nanoscale resolutions. *Journal of Molecular and Cellular Cardiology* **76**,  
767 1-11, doi:10.1016/j.yjmcc.2014.08.010 (2014).
- 768 32 Pinali, C., Bennett, H., Davenport, J. B., Trafford, A. W. & Kitmitto, A. Three-Dimensional  
769 Reconstruction of Cardiac Sarcoplasmic Reticulum Reveals a Continuous Network Linking  
770 Transverse-Tubules. *Circulation Research* **113**, 1219-1230,  
771 doi:10.1161/CIRCRESAHA.113.301348 (2013).
- 772 33 Midgett, M., Thornburg, K. L. & Rugonyi, S. Blood Flow Patterns Underlie Developmental Heart  
773 Defects. *American Journal of Physiology - Heart and Circulatory Physiology* **312**, H632-H642,  
774 doi:10.1152/ajpheart.00641.2016 (2017).

- 775 34 Genoud, C., Titze, B., Graff-Meyer, A. & Friedrich, R. W. Fast Homogeneous En Bloc Staining of  
776 Large Tissue Samples for Volume Electron Microscopy. *Frontiers in Neuroanatomy* **12**,  
777 doi:10.3389/fnana.2018.00076 (2018).
- 778 35 Karnovsky, M. J. A formaldehyde-glutaraldehyde fixative of high osmolality for use in electron-  
779 microscopy. *Journal of Cell Biology* **27**, 137-138A (1965).
- 780 36 Wainrach, S. & Sotelo, J. R. Electron microscope study of the developing chick embryo heart.  
781 *Zeitschrift für Zellforschung und Mikroskopische Anatomie* **55**, 622-634,  
782 doi:10.1007/BF00384502 (1961).
- 783 37 Manasek, F. J. Histogenesis of the embryonic myocardium. *American Journal of Cardiology* **25**,  
784 149-168, doi:10.1016/0002-9149(70)90576-X (1970).
- 785 38 Mukherjee, K. *et al.* Analysis of Brain Mitochondria Using Serial Block-Face Scanning Electron  
786 Microscopy. *JoVE*, e54214, doi:doi:10.3791/54214 (2016).
- 787 39 Butcher, J. T., Sedmera, D., Guldberg, R. E. & Markwald, R. R. Quantitative volumetric analysis of  
788 cardiac morphogenesis assessed through micro-computed tomography. *Developmental*  
789 *Dynamics* **236**, 802-809 (2007).
- 790 40 Hopkins, T. M. *et al.* Combining Micro-Computed Tomography with Histology to Analyze  
791 Biomedical Implants for Peripheral Nerve Repair. *Journal of neuroscience methods* **255**, 122-130,  
792 doi:10.1016/j.jneumeth.2015.08.016 (2015).
- 793 41 Karreman, M. A. *et al.* in *Methods in Cell Biology* Vol. 140 (eds Thomas Müller-Reichert & Paul  
794 Verkade) 277-301 (Academic Press, 2017).
- 795 42 Morales, A. G. *et al.* Micro-CT scouting for transmission electron microscopy of human tissue  
796 specimens. *Journal of Microscopy* **263**, 113-117, doi:doi:10.1111/jmi.12385 (2016).
- 797 43 Sengle, G., Tufa, S. F., Sakai, L. Y., Zulliger, M. A. & Keene, D. R. A Correlative Method for Imaging  
798 Identical Regions of Samples by Micro-CT, Light Microscopy, and Electron Microscopy: Imaging  
799 Adipose Tissue in a Model System. *Journal of Histochemistry & Cytochemistry* **61**, 263-271,  
800 doi:10.1369/0022155412473757 (2012).
- 801 44 Deerinck, T. J. *et al.* Enhancing Serial Block-Face Scanning Electron Microscopy to Enable High  
802 Resolution 3-D Nanohistology of Cells and Tissues. *Microscopy and Microanalysis* **16**, 1138-1139,  
803 doi:10.1017/S1431927610055170 (2010).
- 804 45 Tapia, J. C. *et al.* High-contrast en bloc staining of neuronal tissue for field emission scanning  
805 electron microscopy. *Nature Protocols* **7**, 193, doi:10.1038/nprot.2011.439 (2012).
- 806 46 Mikula, S. & Denk, W. High-resolution whole-brain staining for electron microscopic circuit  
807 reconstruction. *Nature Methods* **12**, 541, doi:10.1038/nmeth.3361 (2015).
- 808 47 Cazaux, J. From the physics of secondary electron emission to image contrasts in scanning  
809 electron microscopy†. *Microscopy* **61**, 261-284, doi:10.1093/jmicro/dfs048 (2012).
- 810 48 Kiserud, T. Physiology of the fetal circulation. *Seminars in Fetal and Neonatal Medicine* **10**, 493-  
811 503, doi:10.1016/j.siny.2005.08.007 (2005).
- 812 49 Dzialowski, E. M. Comparative physiology of the ductus arteriosus among vertebrates. *Seminars*  
813 *in Perinatology* **42**, 203-211, doi:<https://doi.org/10.1053/j.semperi.2018.05.002> (2018).
- 814 50 Iacobazzi, D. *et al.* Cellular and molecular basis of RV hypertrophy in congenital heart disease.  
815 *Heart (British Cardiac Society)* **102**, 12-17, doi:10.1136/heartjnl-2015-308348 (2016).
- 816 51 Jenni, R., Rojas, J. & Oechslin, E. Isolated noncompaction of the myocardium. *New England*  
817 *Journal of Medicine* **340**, 966-967 (1999).
- 818 52 Weiford, B. C., Subbarao, V. D. & Mulherm, K. M. Noncompaction of the ventricular myocardium.  
819 *Circulation* **109**, 2965-2971 (2004).
- 820 53 Finsterer, J., Stollberger, C. & Towbin, J. A. Left ventricular noncompaction cardiomyopathy:  
821 cardiac, neuromuscular, and genetic factors. *Nat Rev Cardiol* **14**, 224-237,  
822 doi:10.1038/nrcardio.2016.207 (2017).

- 823 54 Sedmera, D., Pexieder, T., Rychterova, V., Hu, N. & Clark, E. B. Remodeling of chick embryonic  
824 ventricular myoarchitecture under experimentally changed loading conditions. *The Anatomical*  
825 *Record*. **254**, 238-252 (1999).
- 826 55 Hamburger, V. & Hamilton, H. L. A series of normal stages in the development of the chick  
827 embryo. *Developmental Dynamics* **195**, 231-272, doi:10.1002/aja.1001950404 (1992).
- 828 56 Tobita, K., Garrison, J. B., Liu, L. J., Tinney, J. P. & Keller, B. B. Three-dimensional myofiber  
829 architecture of the embryonic left ventricle during normal development and altered mechanical  
830 loads. *The Anatomical Record Part A: Discoveries in Molecular, Cellular, and Evolutionary Biology*  
831 **283A**, 193-201, doi:10.1002/ar.a.20133 (2005).
- 832 57 Ronneberger, O., Fischer, P. & Brox, T. in *Medical Image Computing and Computer-Assisted*  
833 *Intervention – MICCAI 2015*. (eds Nassir Navab, Joachim Hornegger, William M. Wells, &  
834 Alejandro F. Frangi) 234-241 (Springer International Publishing).
- 835
